# Supplementary material for: Highly Active Rare-Earth-Metal La-Doped Photocatalysts: Fabrication, Characterization, and Their Photocatalytic Activity
Source: Hindawi journal article supplement (doi:10.1155/2012/921412), 2011-12-22
Supplement: f1 [file 921412.f1.docx]

**Electron Dispersive Spectroscopic images of pure TiO2 and La-doped TiO2:**

The presence of elements in TiO2 and La-doped TiO2 were analyzed bythe scanning electron microscope coupled with energy dispersive X-ray spectroscope (SEM-EDX) and the results are shown in Figures 1sa & 1sb. Fig.1sa reveals the presence of Ti, and O for TiO2, whereas Fig.1sb shows the presence of not only Ti, and O, but also La for La-doped TiO2. The SEM-EDX results are consistent with XPS analysis.


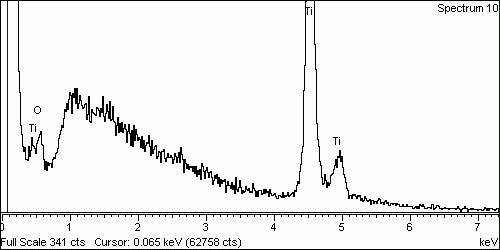


a


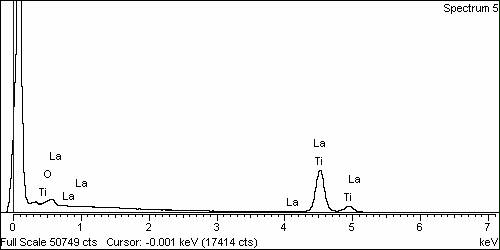


b

**Fig.1s.** EDX spectra of a) TiO2, and b) 1 wt% La-doped TiO2
